# Supplementary material for: Single-Quantum Sodium MRI at 3T for the Separation of Mono- and Bi-T2 Sodium Signals
Source: Research Square preprint supplement (doi:10.21203/rs.3.rs-5456028/v1), 2025-04-07
Supplement: Supplementary file 1 [file 3cd5da903cba73a86f3b0587.pdf]

# Supplementary Information for

## Single-Quantum Sodium MRI at 3T for the Separation of Mono- and Bi-T<sub>2</sub> Sodium Signals

Yongxian Qian,<sup>1,2,\*</sup> Ying-Chia Lin,<sup>1</sup> Xingye Chen,<sup>1,3</sup> Yulin Ge,<sup>1</sup> Yvonne W. Lui,<sup>1,4</sup> Fernando E. Boada<sup>1,†</sup>

<sup>1</sup> Bernard and Irene Schwartz Center for Biomedical Imaging, Department of Radiology, New York University Grossman School of Medicine, New York, NY 10016.

<sup>2</sup> Neuroscience Institute, New York University Grossman School of Medicine, New York, NY 10016.

<sup>3</sup> Vilcek Institute of Graduate Biomedical Sciences, NYU Grossman School of Medicine, New York, NY 10016.

<sup>4</sup> Department of Radiology, NYU Langone Health, New York, NY 10016.

† Present address: Department of Radiology, Stanford University, Stanford, CA 94305.

\* Corresponding author. Email: [Yongxian.Qian@nyulangone.org](mailto:Yongxian.Qian@nyulangone.org)

### This PDF file includes:

Supplementary Text  
Figs. S1 to S5  
References (no)

## 26 **Extrapolation of $N$ -term exponential decay**

27 We once accidentally read a reference in literature about this topic, but could not find the citation at  
28 hand, thus summarize here the algorithm in our own language, specifically for the recovery of  
29 FID signals. If a signal  $f(t)$  is an  $N$ -term exponential decay as defined in equation (S1) with  
30 parameters  $\{A_i, b_i; i = 1, 2, \dots, N\}$ , and is sampled at a uniform interval  $\Delta t$ , then a sample  $f(t_0)$   
31 at time  $t_0$  can be represented by a linear combination of its late-time neighboring samples  
32  $\{f(t_0 + j\Delta t), j = 1, 2, \dots, M\}$ , as shown in equation (S2), with coefficients  $\{a_j, j = 1, 2, \dots, M \geq$   
33  $N\}$  to be determined.

$$34 \quad f(t) = \sum_{i=1}^N A_i e^{-t \cdot b_i} \quad (\text{S1})$$

$$35 \quad f(t_0) = \sum_{j=1}^M a_j f(t_0 + j\Delta t) \quad (\text{S2})$$

36 *Proof.* Extending  $f(t_0 + j\Delta t)$  in equation (S2) according to equation (S1) gives

$$37 \quad f(t_0) = \sum_{j=1}^M a_j \left[ \sum_{i=1}^N (A_i e^{-t_0 \cdot b_i}) (e^{-j\Delta t \cdot b_i}) \right]$$
$$38 \quad = \sum_{i=1}^N A_i e^{-t_0 \cdot b_i} \left( \sum_{j=1}^M a_j e^{-j\Delta t \cdot b_i} \right). \quad (\text{S3})$$

39 Select time-invariant coefficients  $\{a_j, j = 1, 2, \dots, M > N\}$  to satisfy equation (S4), thus equation  
40 (S2) holds.

$$41 \quad \sum_{j=1}^M a_j e^{-j\Delta t \cdot b_i} = 1, \text{ for } i = 1, 2, \dots, N. \quad (\text{S4})$$

42 *Note.* The descriptions above are for backward extrapolation in time and used in the recovery of  
43 FID signal. The forward extrapolation also holds if  $\Delta t$  is replaced with  $-\Delta t$  in equations (S2–S4).  
44 To find the unknown coefficients  $\{a_j, j = 1, 2, \dots, M\}$ , equation (S2), instead of equation (S4), is  
45 usually used on such a segment of  $f(t)$  that it is not distorted and involves all the  $N$  exponential  
46 decays. The number of data samples on the segment should be larger than  $M$  to form an over-  
47 determined problem in case of random noise existing in the signal  $f(t)$ .

## 49 **Correction for hardware-related distortion of FID signal**

50 Fig. S1 demonstrates an FID signal from a healthy subject (52 years old, male), with and without  
51 correction for the distortion at the first five ADC samples using equation (S2) with  $(M, N) = (5,$   
52  $3)$ . The correction removed distortion and reduced overall residual fitting error from 2.33% to  
53 1.49%. The correction also improved resolution of short- $T_2^*$  components: from singlet at 2.5ms  
54 to doublet at 0.5ms and 2.5ms (Figs. S1a3, b3).

55 **Fig. S1. FID signal and  $T_2^*$  spectrum with and without correction.**

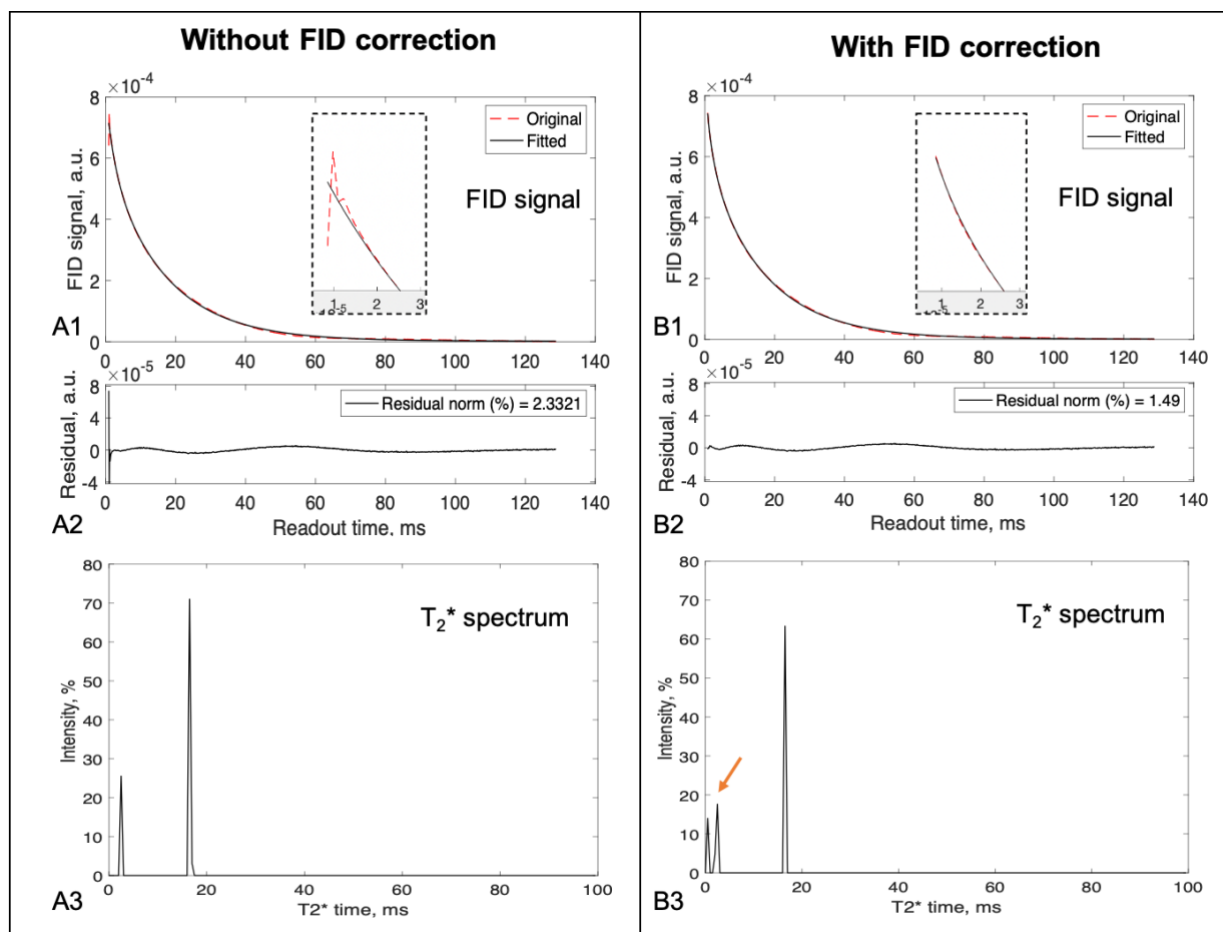

56  
57

58 **Fig. S1.** FID signals (top) and  $T_2^*$  spectra (bottom) from whole brain of a healthy subject (52 years old, male), with  
59 (Fig. S1b) and without (Fig. S1a) correction for FID distortion at the first five samples shown in the insets. In the  
60 middle are residual errors from the fitting using the  $T_2^*$  spectra in the bottom. The FID correction removed the  
61 distortion, significantly reduced residual error, and clearly improved resolution of short- $T_2^*$  components from singlet  
62 at 2.5ms to doublet at 0.5ms and 2.5ms as well as peaks' intensity (Fig. S1b3). Data acquisition: 3T scanner (Prisma,  
63 Siemens) with a custom-built dual-tuned ( $^1\text{H}$ - $^{23}\text{Na}$ ) 8-channel head array coil [32], *fid* sequence, rectangular RF  
64 duration=0.5ms, TE/TR=0.35/300ms, averages=128, ADC samples=1024 at an interval of 0.125ms.

65 **Calculation stability of  $T_2^*$  spectrum at a high resolution of  $\Delta T_2^*=0.5\text{ms}$**

66  $T_2^*$  spectrum was calculated via equation (5) on an FID signal using an established algorithm –  
 67 the non-negative least squares (NNLS) – at a high spectral resolution of  $\Delta T_2^*=0.5\text{ms}$  in a range of  
 68 0.5–100 ms. Such a high resolution raises a concern on the stability of calculation as the base  
 69 functions at these spectral locations,  $\exp(-t/T_2^*)$ , are not independent from each other. To  
 70 address this concern, we employed singular value decomposition (SVD) to analyze the transfer  
 71 matrix  $\mathbf{E}$  in equations (S5) and used numerical simulations to detail the impact of random noise  
 72 on the  $T_2^*$  spectrum in equation (S6).

$$73 \quad E_{i,j} \equiv \exp(-t_i/T_{2,j}^*), \quad i = 1, 2, \dots, N, \quad j = 1, 2, \dots, M, \quad N \gg M \quad (\text{S5a})$$

$$74 \quad \mathbf{E}^T \mathbf{E} = \mathbf{U} \mathbf{\Sigma} \mathbf{V}^T \quad (\text{S5b})$$

$$75 \quad \mathbf{\Sigma} = \text{diag}(\sigma_1, \sigma_2, \dots, \sigma_M) \quad (\text{S5c})$$

76 with sampling time  $t_i = TE + (i - 1) * \Delta t$  and spectral location  $T_{2,j}^* = j * \Delta T_2^*$ . Singular values  
 77  $\{\sigma_j, j = 1, 2, \dots, M\}$  determine stability of the calculation for  $T_2^*$  spectrum in terms of random  
 78 noise interference in equation (5). Correlation coefficients between the base functions are also  
 79 calculated.

$$80 \quad R_{j_1, j_2} = (E^T E)_{j_1, j_2} / \sqrt{(E^T E)_{j_1, j_1} (E^T E)_{j_2, j_2}} \quad j_1, j_2 = 1, 2, \dots, M \quad (\text{S6})$$

81 At  $\Delta t = 0.05\text{ms}$ ,  $TE=0.2\text{ms}$  and  $N=2048$ , the singular values and correlation coefficients were  
 82 calculated and shown in Fig. S2. The singular value  $\sigma$  quickly decreases to zero ( $<10^{-10}$ ) at index  
 83 (15, 13, 10, 9) when  $\Delta T_2^*$  increases from 0.5ms to 1.0, 3.0 and 5.0 ms, respectively. This  
 84 indicates the existence of null subspace or multiple solutions for  $T_2^*$  spectrum (Fig. S2, top). The  
 85 normalized correlation coefficients  $R$  between any two base functions is spreading out from  
 86 diagonal line, confirming non-orthogonal between the base functions (Fig.S2, bottom). However,  
 87 the extent of spreading is narrower for short  $T_2^*$  values at high resolution  $\Delta T_2^* = 0.5\text{ms}$  than at  
 88 low resolution  $\Delta T_2^* = 5\text{ms}$ .

89 Numerical simulations for the impact of random noise on the  $T_2^*$  spectrum was performed  
 90 at three popular components,  $T_2^*=3, 15$ , and  $50\text{ms}$  with relative amplitudes  $A=30, 20$ , and  $50$ ,  
 91 respectively, plus an additive normal random noise generated by function  $\text{randn}(n, 1)$ , at  $\text{SNR} \equiv$   
 92  $f(t=0)/\text{SD} = 100, 50$ , and  $25$ . Outcomes of the simulations were summarized in Fig. S3, where  
 93 peak parameters at doublets (Fig. S3, bottom) were linearly combined with amplitude-weighting  
 94 by left- and right-peaklets in equation (S7). The best spectrum was achieved at  $\text{SNR}=100$  among  
 95 the three noisy cases, relative to no noise.

$$96 \quad T_2^* = (A_L * T_{2,L}^* + A_R * T_{2,R}^*) / A, \quad (\text{S7a})$$

$$97 \quad A = A_L + A_R \quad (\text{S7b})$$

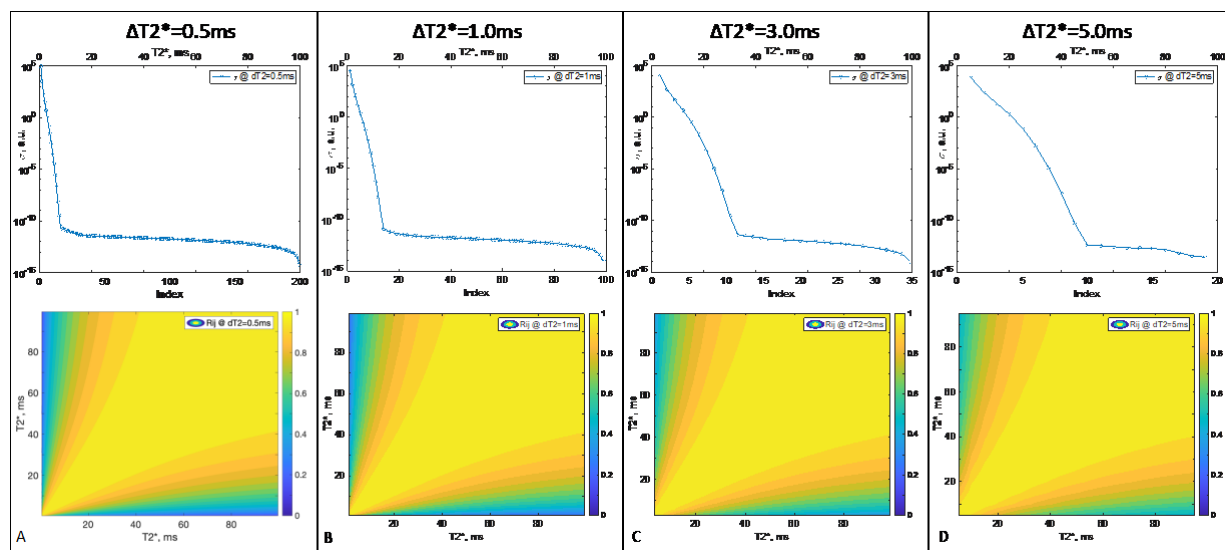

**Fig. S2.** The SVD singular values of matrix  $E^T E$  (top) and correlation coefficients of the base-in matrix  $E$  (bottom). (A) – (D)  $T_2^*$  spectral resolution at  $\Delta T_2^* = 0.5, 1.0, 3.0$ , and  $5.0$ ms. In the top, singular value  $\sigma$  quickly decreases to zero ( $< 10^{-10}$ ) at index (15, 13, 10, 9) respectively, indicating the existence of null subspace or multiple solutions for the  $T_2^*$  spectrum. In the bottom, the normalized correlation coefficient  $R_{j,l,j_2}$  between any two  $T_2^*$  base functions  $\exp(-t/T_{2,j}^*)$  is spreading out from diagonal line, showing non-orthogonal between the base functions.

100 **Fig. S3. Numerical simulations for the impact of random noise on  $T_2^*$  spectrum.**

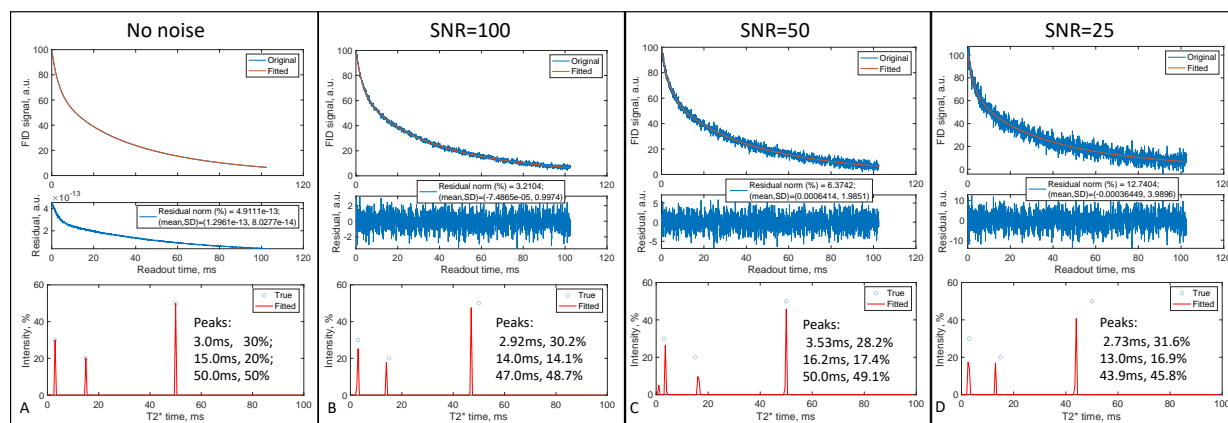

**Fig. S3.** Calculation stability of  $T_2^*$  spectrum using the algorithm NNLS via MATLAB function *lsqnonneg(C,d)* and the numerical simulations at three popular components (circles  $\circ$ ):  $T_2^* = (3, 15, 50)$ ms with relative amplitudes  $A = (30, 20, 50)$  plus an additive random noise generated by function *randn(n,1)*. (A) – (D) are the simulations at  $\Delta T_2^* = 0.5$ ms with noise at three typical values  $SNR = 100, 50$ , and  $25$ . The peak parameters at doublets (bottom) were linearly combined with amplitude-weighting defined in equation S7. The best spectrum was achieved at  $SNR = 100$  among the three noisy cases.

102 **Measurement stability of FID signals on whole brain:  $B_0$  shimming**  
 103 The  $B_0$  shimming may change from subject to subject in routine practice, leading to a concern on  
 104 the measurement stability of FID signals, thus the  $T_2^*$  spectra, from whole brain across subjects.  
 105 This concern is addressable because sodium ( $^{23}\text{Na}$ ) MRI has about 4-fold lower resonance  
 106 frequency than proton ( $^1\text{H}$ ) MRI (e.g., 33.8 vs. 127.7 MHz at 3T), and the manual shimming  
 107 (three iterations) is better than auto shimming. Fig. S4 shows the results of all the 15 subjects  
 108 studied, with a small standard deviation (SD) in whole-brain histograms. There was no significant  
 109 difference between the healthy and patient groups ( $P=0.908$ ). Thus, the manual shimming, or  
 110  $\Delta B_0$ , is stable.

111

112 **Fig. S4. Measurement stability of FID signals on whole brain:  $B_0$  shimming**

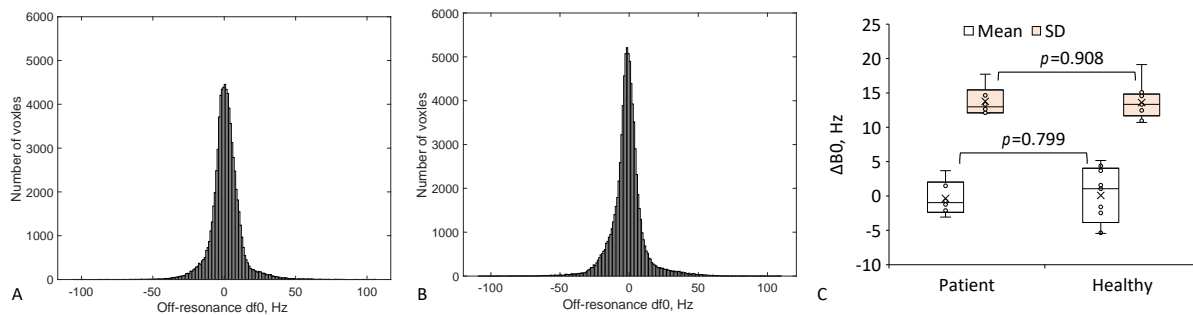

**Fig. S4.** Whole brain histograms of  $\Delta B_0$  mapping at  $\text{TE}_1/\text{TE}_2 = 0.5/5\text{ms}$  under a manual shimming procedure (3 iterations). **(A)** A representative histogram from a healthy subject (52 years old, male), with  $\text{mean} \pm \text{SD} = 1.0 \pm 10.7$  Hz. **(B)** A representative from a patient with epilepsy (31 years old, male), with  $\text{mean} \pm \text{SD} = -1.2 \pm 12.1$  Hz. **(C)** Mean and SD distribution of whole brain  $\Delta B_0$  histograms from all the 15 study subjects (circles o) including 9 healthy and 6 patients, showing no significant difference between the two groups (healthy vs. patient),  $P = 0.799$  for the mean and  $P = 0.908$  for the SD.

113

114 ***Invisibility of CSF  $T_2^*$  peaks in the spectrum: single  $T_2^*$  mapping***  
 115 Cerebrospinal fluid (CSF) in the brain is known to have a  $T_2^*$  value of  $\sim 50$  ms as seen in single-  
 116  $T_2^*$  maps (Figs. 7, 8). But this sodium population was not observed in the  $T_2^*$  spectra. This  
 117 phenomenon might be caused by small volume of CSF relative to whole brain. To confirm this  
 118 cause, Fig. S5 presents two representative whole-brain histograms of single- $T_2^*$  mapping, with  
 119 very small numbers of voxels (invisible bins) for CSF at  $T_2^*$  around 50ms.

120 **Fig. S5. Invisibility of CSF  $T_2^*$  peak in the spectrum: single  $T_2^*$  mapping.**  
 121

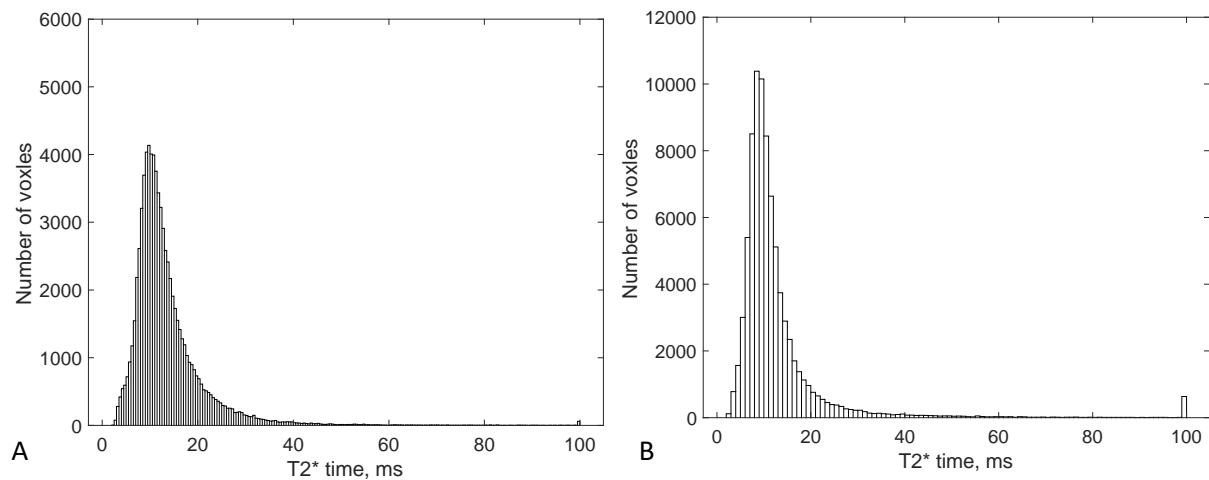

**Fig. S5.** Representative whole-brain histograms of single- $T_2^*$  mapping at  $TE_1/TE_2 = 0.5/5$ ms. **(A)** A healthy subject (52 years old, male). **(B)** An epilepsy patient (31 years old, male). These, as well as the other healthy subjects and patients we studied, showed very small numbers (invisible bins) of voxels for CSF at  $T_2^* \sim 50$ ms. Note: a visible bin at  $T_2^* = 100$ ms counts for voxels of  $T_2^*$  values  $\geq 100$ ms.
